# Supplementary material for: Transcriptome and Cell Physiological Analyses in Different Rice Cultivars Provide New Insights Into Adaptive and Salinity Stress Responses
Source: Front Plant Sci. 2018 Mar 5;9:204. doi: 10.3389/fpls.2018.00204 (PMC5844958; doi:10.3389/fpls.2018.00204)
Supplement: Supplementary file 1 [file Table_1.XLSX]

## Sheet: Foglio1
Supplementary Table 1. Hoagland solution modified, pH 5.8.
KNO3	1.5 mM
Ca(NO3)2	1 mM
MgSO4	0.5 mM
NH4H2PO4	250 mM
H3BO3	46 mM
MnCl2	9 mM
ZnSO4	0.8 mM
CuSO4	0.3 mM
(NH4)6Mo7O24	0.1 mM
FeNaEDTA	25 mM
Na2O3Si	30 mM
