# Supplementary material for: Transcriptome and Cell Physiological Analyses in Different Rice Cultivars Provide New Insights Into Adaptive and Salinity Stress Responses
Source: Front Plant Sci. 2018 Mar 5;9:204. doi: 10.3389/fpls.2018.00204 (PMC5844958; doi:10.3389/fpls.2018.00204)
Supplement: Supplementary file 9 [file Table_9.XLSX]

## Sheet: Foglio1
Supplementary Table 9. List of DEGs in the differentially expressed pathway “Plant-pathogen interaction”.
MSU Gene ID	Description	Kegg ID	log2 FC	P-value	FDR
Os05g40160	NB-ARC domain containing protein, expressed	ko:K13457	-0.24174	0.182191	0.323858
Os11g38000	NB-ARC domain containing protein, expressed	ko:K13457	0.19398	0.17069	0.30918
Os11g32170	stripe rust resistance protein Yr10, putative, expressed	ko:K13457	1.06247	2.04279e-05	0.000154857
Os11g12340	disease resistance protein RPM1, putative, expressed	ko:K13457	-1.021	1.81237e-10	3.44706e-09
Os10g22510	MLA1, putative, expressed	ko:K13457	-0.19946	0.169881	0.308061
Os08g10440	NBS-LRR disease resistance protein, putative, expressed	ko:K13457	0.26097	0.0568527	0.134905
Os12g36720	RGH1A, putative, expressed	ko:K13457	0.08395	0.454882	0.613925
Os11g37880	stripe rust resistance protein Yr10, putative, expressed	ko:K13457	2.20518	2.06896e-42	4.14425e-40
Os06g33360	RGH1A, putative, expressed	ko:K13457	1.01465	1.19902e-06	1.19227e-05
Os01g41890	MLA1, putative, expressed	ko:K13457	0.48748	0.0364807	0.0948448
Os06g17900	disease resistance protein RPM1, putative, expressed	ko:K13457	0.71304	0.0154438	0.0478974
Os11g16530	mal, putative, expressed	ko:K13457	0.79584	2.69512e-07	3.06333e-06
Os12g17480	MLA12, putative, expressed	ko:K13457	1.01958	3.56876e-06	3.19564e-05
Os07g19320	stripe rust resistance protein Yr10, putative, expressed	ko:K13457	-1.30538	5.25725e-10	9.2403e-09
Os08g30634	DC1 domain containing protein, expressed	ko:K13457	0.605	0.0328499	0.0872551
Os06g06860	MLA1, putative, expressed	ko:K13457	0.612	0.00284871	0.011832
Os09g34150	NBS-LRR disease resistance protein, putative, expressed	ko:K13457	-1.06736	5.67777e-05	0.000387238
Os11g27430	NB-ARC domain containing protein, expressed	ko:K13457	0.43435	0.103294	0.214239
Os12g37760	RGH1A, putative, expressed	ko:K13457	0.00417	0.976933	0.986675
Os10g04110	MLA6 protein, putative, expressed	ko:K13457	1.05125	0.006419	0.0232301
Os06g06380	NBS-LRR type disease resistance protein, putative, expressed	ko:K13457	0.22215	0.128709	0.252622
Os08g28570	resistance protein, putative, expressed	ko:K13457	-1.13118	1.3271e-05	0.000104485
Os11g47447	stripe rust resistance protein Yr10, putative, expressed	ko:K13457	0.29033	0.290727	0.454764
Os12g17490	stripe rust resistance protein Yr10, putative, expressed	ko:K13457	0.63162	0.0291452	0.0795597
Os11g11550	NBS-LRR disease resistance protein, putative, expressed	ko:K13457	0.63207	7.931e-05	0.000519558
Os01g36640	disease resistance protein RPM1, putative, expressed	ko:K13457	0.56796	2.02411e-05	0.000153755
Os11g43700	RGH1A, putative, expressed	ko:K13457	-0.57655	0.0521907	0.126269
Os01g16390	NB-ARC domain containing protein, expressed	ko:K13457	0.23499	0.421548	0.584187
Os04g14220	disease resistance protein RPM1, putative, expressed	ko:K13457	1.20602	0.000491509	0.0026063
Os08g07774	disease resistance protein RPM1, putative, expressed	ko:K13457//ko:K13418	0.48175	0.000223332	0.00130159
Os11g12240	retrotransposon protein, putative, unclassified, expressed	ko:K13457	-1.63901	1.89527e-05	0.000145008
Os08g29809	resistance protein LR10, putative, expressed	ko:K13457	0.7441	1.28612e-05	0.000101594
Os09g19280	retrotransposon protein, putative, unclassified, expressed	ko:K13457	-1.08151	0.0126307	0.0406708
Os06g06400	NBS-LRR type disease resistance protein, putative, expressed	ko:K13457	1.1534	1.26942e-15	4.63455e-14
Os08g32880	disease resistance protein RPM1, putative, expressed	ko:K13457	-0.39233	0.0109665	0.0361771
Os12g09240	NBS-LRR disease resistance protein, putative, expressed	ko:K13457	1.09664	6.4111e-05	0.000431038
Os01g70080	NB-ARC domain containing protein, expressed	ko:K13457	0.04536	0.787656	0.870069
Os11g37740	stripe rust resistance protein Yr10, putative, expressed	ko:K13457	0.81464	0.00627637	0.0228143
Os12g09710	NBS-LRR disease resistance protein, putative, expressed	ko:K13457	-2.45957	6.73799e-08	8.62479e-07
Os11g11940	MLA10, putative, expressed	ko:K13457	0.47338	0.000285503	0.00161441
Os02g09790	disease resistance protein RPM1, putative, expressed	ko:K13457	0.3639	0.204695	0.353079
Os09g09490	disease resistance protein RPM1, putative, expressed	ko:K13457	1.55823	2.00941e-13	5.57072e-12
Os12g06920	NBS-LRR disease resistance protein, putative, expressed	ko:K13457	1.2463	0.000475698	0.00253515
Os01g16400	NB-ARC domain containing protein, expressed	ko:K13457	-0.00376	0.985769	0.99188
Os04g46300	disease resistance protein RPM1, putative, expressed	ko:K13457	0.43495	0.0828137	0.180936
Os02g35210	resistance protein, putative, expressed	ko:K13457	0.62326	0.0222864	0.0643695
Os12g17090	stripe rust resistance protein Yr10, putative, expressed	ko:K13457	0.39544	0.000599725	0.00310099
Os06g03500	NBS-LRR disease resistance protein, putative, expressed	ko:K13457	0.29869	0.0157201	0.0485917
Os12g36690	mla1, putative, expressed	ko:K13457	0.01922	0.890442	0.934783
Os12g31200	NB-ARC domain containing protein, expressed	ko:K13457	-0.17727	0.284649	0.44819
Os09g30220	disease resistance protein RPM1, putative, expressed	ko:K13457	-0.14082	0.576413	0.716096
Os04g21890	disease resistance protein RPM1, putative, expressed	ko:K13457	-0.87278	3.85666e-05	0.00027466
Os08g10430	NBS-LRR disease resistance protein, putative, expressed	ko:K13457	-0.09572	0.658803	0.777362
Os08g16120	disease resistance protein RPM1, putative, expressed	ko:K13457	0.73945	0.0176888	0.0536115
Os06g05359	NBS-LRR disease resistance protein, putative, expressed	ko:K13457	1.31593	6.40939e-12	1.50614e-10
Os07g40810	NBS-LRR type disease resistance protein, putative, expressed	ko:K13457	0.761	0.00510796	0.0192525
Os06g17930	NBS-LRR disease resistance protein, putative, expressed	ko:K13457	2.89253	2.11533e-25	1.85166e-23
Os10g07574	transposon protein, putative, unclassified, expressed	ko:K13457	-0.6435	0.054922	0.131291
Os07g09940	NBS-LRR resistance protein, putative, expressed	ko:K13457	-0.00433	0.991659	0.995148
Os10g04180	NB-ARC domain containing protein, expressed	ko:K13457	0.13502	0.335195	0.501274
Os01g33810	disease resistance protein RPM1, putative, expressed	ko:K13457	-0.62122	1.21338e-05	9.65237e-05
Os10g04342	stripe rust resistance protein Yr10, putative, expressed	ko:K13457	0.12773	0.256565	0.416536
Os11g03650	mla1, putative, expressed	ko:K13457	0.46219	0.121318	0.241983
Os11g43420	LZ-NBS-LRR class RGA, putative, expressed	ko:K13457	0.91665	1.11741e-09	1.8652e-08
Os01g23380	stripe rust resistance protein Yr10, putative, expressed	ko:K13457	-0.1914	0.134017	0.260056
Os12g30080	disease resistance protein RPM1, putative, expressed	ko:K13457	2.52974	3.76704e-08	5.06693e-07
Os12g33160	RGH1A, putative, expressed	ko:K13457	0.0111	0.947318	0.96976
Os09g30230	disease resistance protein RPM1, putative, expressed	ko:K13457	0.56787	0.0184793	0.0555283
Os12g31160	MLA10, putative, expressed	ko:K13457	-0.4031	0.00235715	0.0101156
Os06g06850	resistance protein LR10, putative, expressed	ko:K13457	-0.8608	4.35215e-08	5.77361e-07
Os06g48520	disease resistance protein RPM1, putative, expressed	ko:K13457	0.36648	0.111896	0.227745
Os11g11580	NB-ARC domain containing protein, expressed	ko:K13457	0.02306	0.846041	0.907899
Os11g29050	NBS-LRR type disease resistance protein, putative, expressed	ko:K13457	1.11415	5.77875e-10	1.01089e-08
Os11g34920	stripe rust resistance protein Yr10, putative, expressed	ko:K13457	0.03135	0.803236	0.879926
Os08g05440	NB-ARC domain containing protein, expressed	ko:K13457	0.00071	0.996731	0.997912
Os08g13800	NB-ARC domain containing protein, expressed	ko:K13457	-2.3813	4.05735e-08	5.43441e-07
Os08g14830	NB-ARC domain containing protein, expressed	ko:K13457	-0.65491	1.0715e-05	8.59749e-05
Os08g07920	disease resistance protein RPM1, putative, expressed	ko:K13457	0.19472	0.577746	0.717145
Os01g16370	NBS-LRR type disease resistance protein, putative, expressed	ko:K13457	0.37393	0.215579	0.367182
Os11g39290	Leucine Rich Repeat family protein, expressed	ko:K13457	0.42951	0.228804	0.383364
Os11g29030	disease resistance protein RPM1, putative, expressed	ko:K13457	0.74146	0.00169871	0.00764711
Os11g15190	RGH1A, putative, expressed	ko:K13457	0.31297	0.0970977	0.204678
Os12g17410	NB-ARC domain containing protein, expressed	ko:K13457	-0.09974	0.610037	0.741543
Os05g15040	NB-ARC domain containing protein, expressed	ko:K13457	0.12059	0.29189	0.455891
Os12g28100	NBS-LRR disease resistance protein, putative, expressed	ko:K13457	0.654	6.73052e-05	0.0004502
Os08g05800	retrotransposon protein, putative, unclassified, expressed	ko:K13457	0.38284	0.0715169	0.161269
Os08g32890	disease resistance protein RPM1, putative, expressed	ko:K13457	-0.21753	0.396801	0.561848
Os12g37740	resistance protein LR10, putative, expressed	ko:K13457	0.64801	0.0092424	0.031455
Os07g08890	disease resistance protein RPM1, putative, expressed	ko:K13457	0.49518	0.0123394	0.039935
Os06g17880	NBS-LRR disease resistance protein, putative, expressed	ko:K13457	0.0738	0.779225	0.864159
Os03g46550	RGH1A, putative, expressed	ko:K13457	0.34049	0.035207	0.0922863
Os06g48990	Leucine Rich Repeat family protein, expressed	ko:K13457	0.38964	0.00179629	0.00801446
Os05g40150	RGH2B, putative, expressed	ko:K13457	-0.45392	0.00383884	0.0151013
Os11g46140	stripe rust resistance protein Yr10, putative, expressed	ko:K13457	-0.00155	0.995005	0.996574
Os11g14380	resistance protein LR10, putative, expressed	ko:K13457	1.33581	0.00056297	0.00293415
Os08g07330	RGH1A, putative, expressed	ko:K13457	-0.13367	0.33189	0.498025
Os11g34880	NB-ARC domain containing protein, expressed	ko:K13457	0.68518	0.0574284	0.135909
Os08g10260	NBS-LRR disease resistance protein, putative, expressed	ko:K13457	0.36225	0.0924905	0.197222
Os10g22484	RGH2B, putative, expressed	ko:K13457	0.01003	0.953845	0.973549
Os12g18360	NB-ARC domain containing protein, expressed	ko:K13457	0.36505	0.0225011	0.0648505
Os06g17950	NBS-LRR disease resistance protein, putative, expressed	ko:K13457	0.37866	0.00341859	0.013725
Os11g12320	disease resistance protein RPM1, putative, expressed	ko:K13457	0.52586	0.108339	0.221928
Os08g29854	RGH1A, putative, expressed	ko:K13457	0.40796	0.00407015	0.0158988
Os08g31800	RGH1A, putative, expressed	ko:K13457	-0.06854	0.699002	0.808112
Os09g34160	resistance protein, putative, expressed	ko:K13457	-1.22097	0.0422994	0.106873
Os11g39230	retrotransposon protein, putative, unclassified, expressed	ko:K13457	0.14738	0.445956	0.60626
Os11g12000	NBS-LRR disease resistance protein, putative, expressed	ko:K13457	-0.3678	0.0970631	0.204674
Os11g37870	stripe rust resistance protein Yr10, putative, expressed	ko:K13457	0.02813	0.907885	0.945698
Os03g30910	disease resistance protein RPM1, putative, expressed	ko:K13457	0.33032	0.221367	0.374231
Os11g11920	resistance protein, putative, expressed	ko:K13457	-0.13981	0.258057	0.418428
Os12g31620	disease resistance protein RPM1, putative, expressed	ko:K13457	2.3175	1.11654e-07	1.36628e-06
Os08g16070	NB-ARC domain containing protein, expressed	ko:K13457	0.41714	0.00664892	0.0239095
Os11g27440	MLA7, putative, expressed	ko:K13457	0.41604	0.137614	0.265046
Os11g12040	disease resistance protein RPM1, putative, expressed	ko:K13457	0.35831	0.369147	0.534977
Os06g06390	NBS-LRR type disease resistance protein, putative, expressed	ko:K13457	-0.0758	0.684339	0.796795
Os11g46200	Leucine Rich Repeat family protein, expressed	ko:K13457	0.35315	0.0216246	0.0628007
Os08g14810	NB-ARC domain containing protein, expressed	ko:K13457	0.28999	0.0410238	0.10441
Os11g45924	WRKY41, expressed	ko:K13457	-0.15523	0.373327	0.539348
Os11g39330	NB-ARC domain containing protein, putative, expressed	ko:K13457	0.02734	0.925611	0.957375
Os02g19890	stripe rust resistance protein Yr10, putative, expressed	ko:K13457	0.61308	1.09193e-06	1.09756e-05
Os11g37860	stripe rust resistance protein Yr10, putative, expressed	ko:K13457	1.1326	1.13456e-15	4.16269e-14
Os11g11950	disease resistance protein RPM1, putative, expressed	ko:K13457	-0.20181	0.255567	0.415433
Os11g43320	NBS-LRR type disease resistance protein, putative, expressed	ko:K13457	0.56222	0.00244422	0.0104268
Os08g28470	disease resistance protein RPM1, putative, expressed	ko:K13457	0.52999	0.154141	0.287539
Os11g34970	NB-ARC domain containing protein, expressed	ko:K13457	0.62294	0.00073153	0.00369152
Os11g41170	disease resistance protein RPM1, putative, expressed	ko:K13457	-0.13464	0.362248	0.528438
Os02g17304	resistance protein, putative, expressed	ko:K13457	0.1291	0.354891	0.521489
Os11g45980	NBS-LRR type disease resistance protein, putative, expressed	ko:K13457	-0.50403	0.00144911	0.00667624
Os11g45970	NBS-LRR disease resistance protein, putative, expressed	ko:K13457	-0.31782	0.0184366	0.0554395
Os10g07534	disease resistance protein RPM1, putative, expressed	ko:K13457	0.35819	0.125169	0.247444
Os06g17970	NBS-LRR disease resistance protein, putative, expressed	ko:K13457	0.60156	0.00324678	0.0131492
Os11g16470	MLA10, putative, expressed	ko:K13457	0.44935	0.0380874	0.0981887
Os06g37840	resistance protein, putative, expressed	ko:K13457	0.30971	0.301246	0.465715
Os11g11960	disease resistance protein RPM1, putative, expressed	ko:K13457	-0.758	0.000229718	0.00133196
Os11g12330	disease resistance protein RPM1, putative, expressed	ko:K13457	-0.38564	0.0144746	0.0454528
Os10g03570	RGH1A, putative, expressed	ko:K13457	0.42584	0.00340949	0.0136934
Os11g46210	NB-ARC domain containing protein, expressed	ko:K13457	0.48576	0.00532786	0.0199226
Os12g36730	stripe rust resistance protein Yr10, putative, expressed	ko:K13457	0.33759	0.190682	0.335068
Os04g02860	disease resistance protein RPM1, putative, expressed	ko:K13457	-1.85543	2.1438e-09	3.46152e-08
Os10g07978	disease resistance protein RPM1, putative, expressed	ko:K13457	-0.411	0.0293141	0.0799619
Os11g32210	jacalin-like lectin domain containing protein, expressed	ko:K13457	1.23237	0.000146206	0.000897996
Os12g14330	disease resistance protein RPM1, putative, expressed	ko:K13457	-0.25999	0.384249	0.54991
Os08g38086	heat shock protein, putative, expressed	ko:K09487	0.14003	0.25337	0.413017
Os09g30412	heat shock protein, putative, expressed	ko:K04079	0.38583	0.00550782	0.0204853
Os12g32986	heat shock protein, putative, expressed	ko:K09487	0.0857	0.496774	0.649913
Os08g39140	heat shock protein, putative, expressed	ko:K04079	-0.63274	5.17659e-05	0.000357775
Os06g50300	heat shock protein, putative, expressed	ko:K09487	-0.04713	0.722025	0.824271
Os09g36420	hsp90 protein, expressed	ko:K04079	0.45023	0.07153	0.161282
Os09g30418	heat shock protein, putative, expressed	ko:K04079	0.19535	0.151106	0.283613
Os09g29840	heat shock protein, putative, expressed	ko:K09487	0.05951	0.598915	0.732415
